# Supplementary material for: Tuning the nonlinear susceptibility and linear parameters upon annealing Ag60−xSe40Texnanostructured films for nonlinear and photonic applications
Source: Royal Society of Chemistry journal article supplement (doi:10.1039/d2ma00646d), 2022-01-01
Supplement: d2ma00646d1.pdf [file d2ma00646d1.pdf]

## Supporting Information For

### **Tuning the nonlinear susceptibility and linear parameters upon annealing the $\text{Ag}_{60-x}\text{Se}_{40}\text{Te}_x$ nanostructured films for nonlinear and photonic applications**

Subhashree Das<sup>1</sup>, D. Alagarasan<sup>2</sup>, S. Varadharajaperumal<sup>3</sup>, R. Ganesan<sup>2</sup>, R. Naik<sup>1\*</sup>

<sup>1</sup>*Department of Engineering and Materials Physics, ICT-IOC Bhubaneswar, 751013, India*

<sup>2</sup>*Department of Physics, Indian Institute of Science, Bangalore, 560012, India*

<sup>3</sup>*Centre for Nano Science and Engineering, Indian Institute of Science, 560012, India*

\*Corresponding author: [ramakanta.naik@gmail.com](mailto:ramakanta.naik@gmail.com)

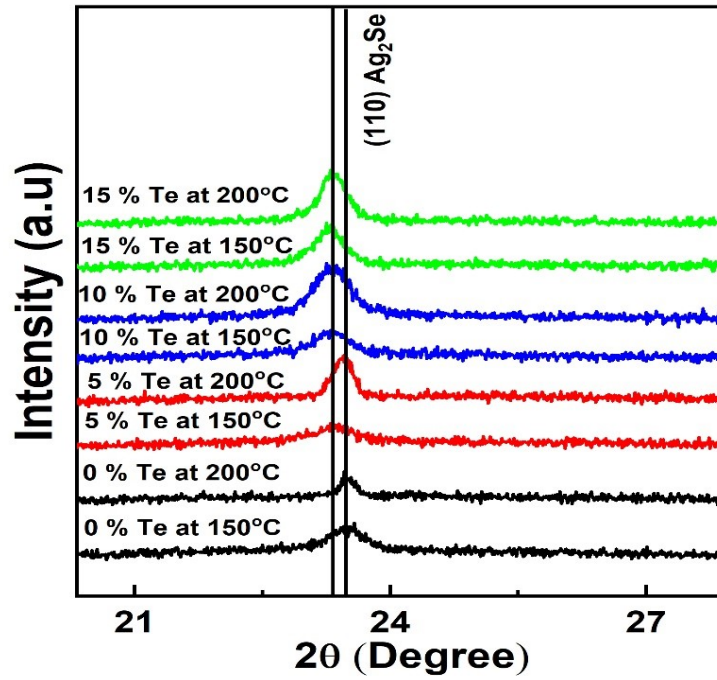

Figure. S1. The XRD pattern of 110 planes (enlarged) to show the peak shifting that corresponds to lattice shifting of the crystalline material.

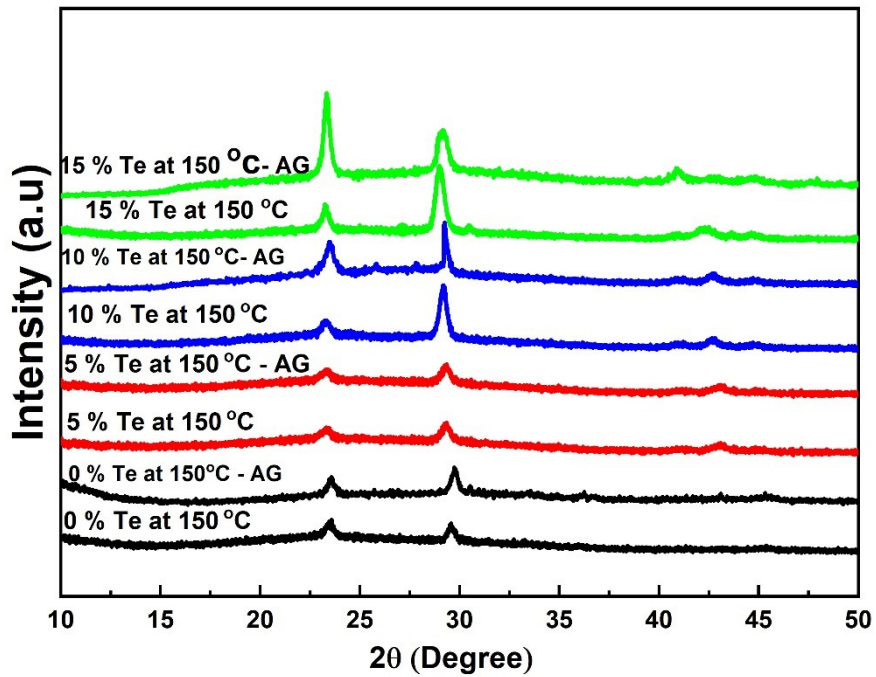

Figure. S2. The XRD pattern of 150 °C annealed  $\text{Ag}_{60-x}\text{Se}_{40}\text{Te}_x$  thin films (Previous data and AG- after aging, the recent data)
